# Supplementary figures and images for: Functionalized carbon microarrays platform for high sensitive detection of HIV-Tat peptide
Source: Royal Society of Chemistry journal article supplement (doi:10.1039/c5ra10214f), 2015-01-01

### Electronic Supplementary Information

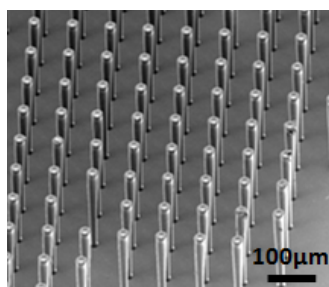

Figure S1: (a) Typical SEM image of 3D carbon microarrays.

Supplement: c5ra10214f1.pdf [file c5ra10214f1.pdf]
